# Supplementary material for: Predictive impact of rare genomic copy number variations in siblings of individuals with autism spectrum disorders
Source: PubMed Central journal article supplement (PMC6892938; doi:10.1038/s41467-019-13380-2), 2019-12-05
Supplement: 41467_2019_13380_MOESM1_ESM.pdf [file 41467_2019_13380_MOESM1_ESM.pdf]

## **Supplementary Information**

“Predictive impact of rare genomic copy number variations in siblings of individuals with autism spectrum disorders”

D’Abate et al.

## Supplementary Information

### Table of Contents

|                               |    |
|-------------------------------|----|
| Supplementary Figure 1.....   | 3  |
| Supplementary Figure 2.....   | 4  |
| Supplementary Figure 3.....   | 5  |
| Supplementary Table 1.....    | 6  |
| Supplementary Table 2.....    | 7  |
| Supplementary Table 3.....    | 8  |
| Supplementary Table 4.....    | 9  |
| Supplementary Table 5.....    | 10 |
| Supplementary Table 6.....    | 11 |
| Supplementary Table 7.....    | 12 |
| Supplementary Table 8.....    | 13 |
| Supplementary Note 1.....     | 14 |
| Supplementary References..... | 17 |

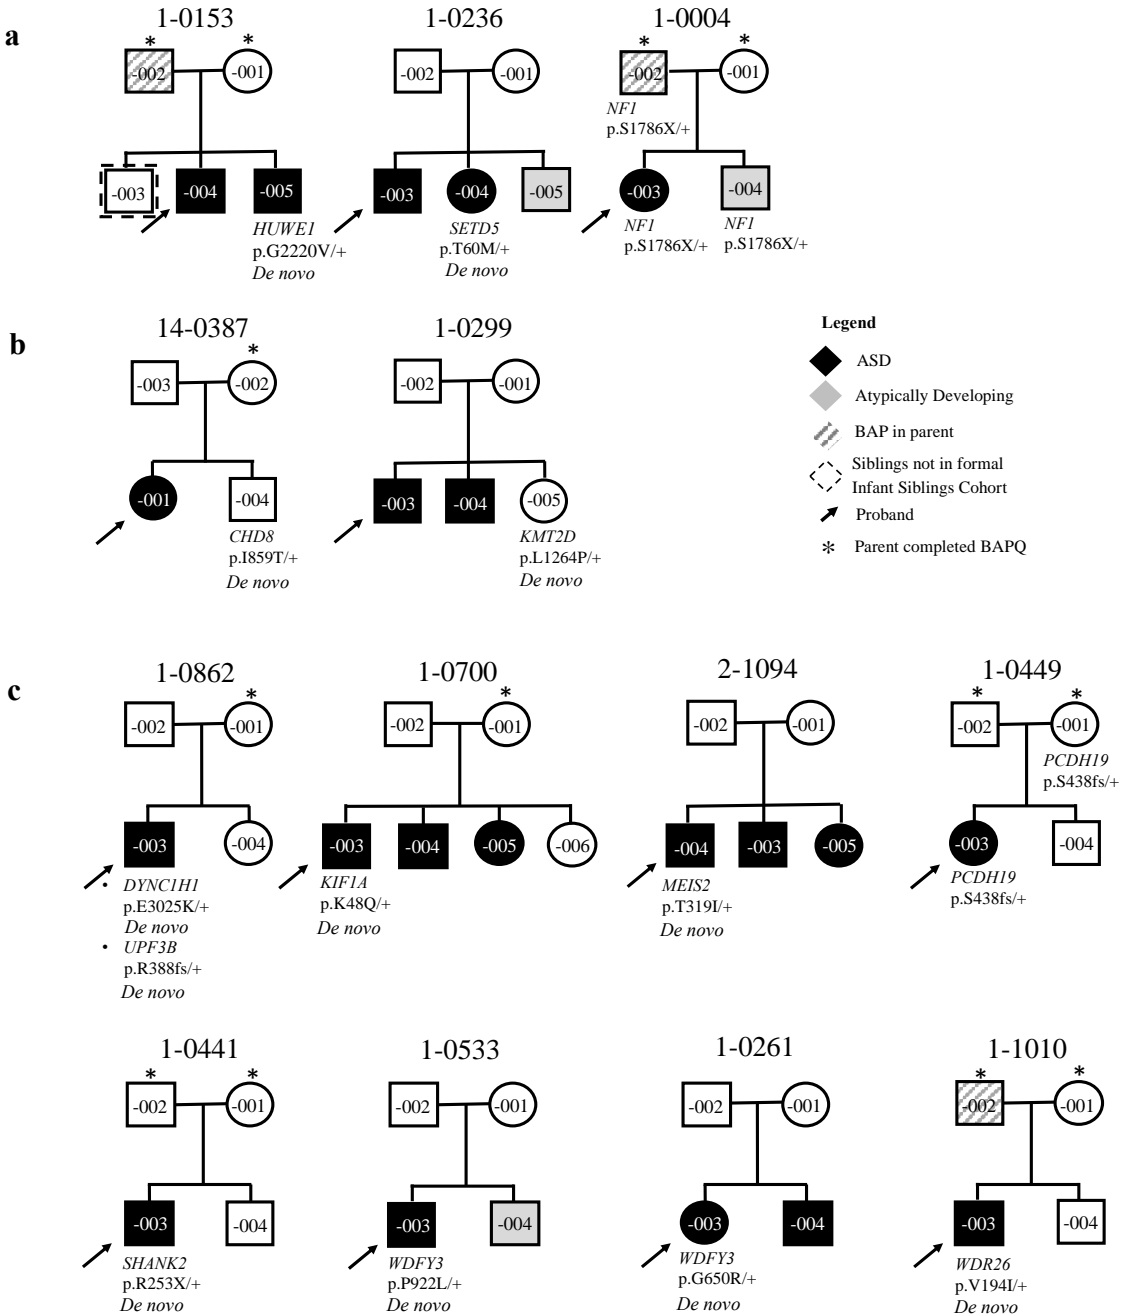

**Supplementary Figure 1. Single-nucleotide variants and indels in probands and infant siblings**

- a.** ASD-relevant SNVs in infant siblings with ASD or who were atypically developing. One variant (family 1-0004) is shared between a proband and atypically developing sibling.
- b.** ASD-relevant SNVs in typically developing infant siblings.
- c.** ASD-relevant SNVs and indels in probands.

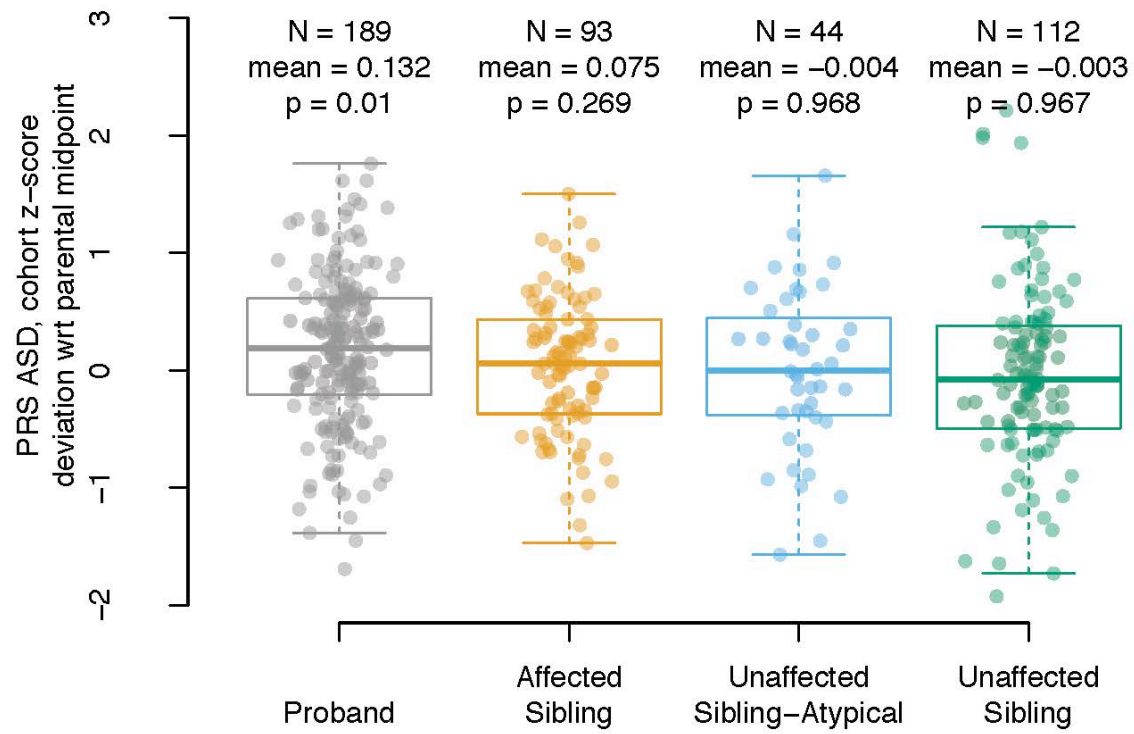

**Supplementary Figure 2. Polygenic risk scores in probands and infant siblings**

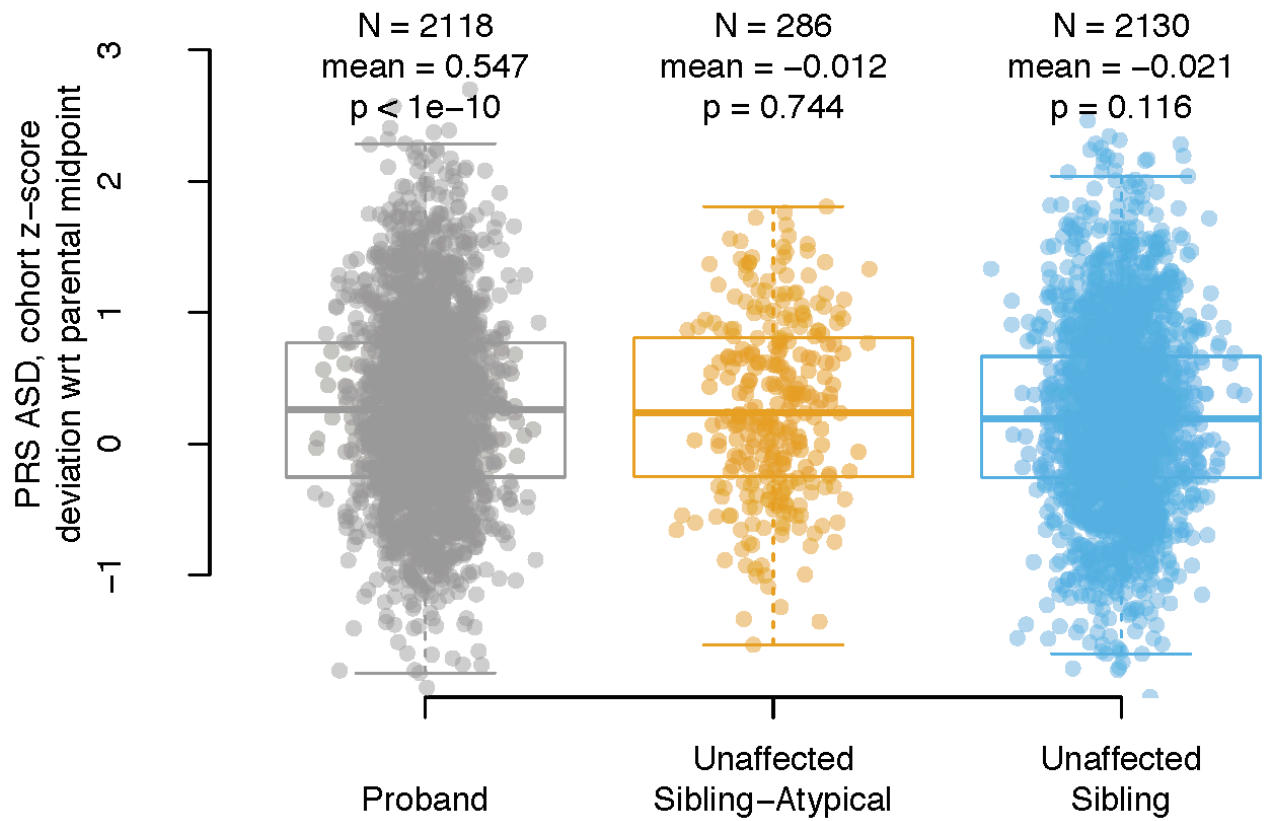

**Supplementary Figure 3. Polygenic risk scores in probands and siblings from the Simons Simplex Collection**

**Supplementary Table 1: Cohort descriptive statistics**

|                                                     | <b>%</b> | <b>Counts</b> | <b>Age at ascertainment (±SD)</b> |
|-----------------------------------------------------|----------|---------------|-----------------------------------|
| Probands, male                                      | 82.6     | 209 (of 253)  |                                   |
| Affected infant siblings, male                      | 78.6     | 81 (of 103)   |                                   |
| Atypically developing infant siblings, male         | 61.1     | 33 (of 54)    |                                   |
| Typically developing infant siblings, male          | 53.4     | 72 (of 131)   |                                   |
| Multiplex families (at ascertainment)               | 37.1     | 94 (of 253)   |                                   |
| Mean age of infant sibling at first visit (months)  |          | 206 (of 288*) | 10.2 (±8.4)                       |
| Mean maternal age at infant sibling's birth (years) |          | 141 (of 242†) | 34.6 (±5.3)                       |
| Mean paternal age at infant sibling's birth (years) |          | 140 (of 205†) | 37 (±6.2)                         |

\* Age of infant siblings at first visit only available for 206 individuals.

† Parental age at sibling's birth only available 141 mothers and 140 fathers, respectively.

**Supplementary Table 2: Psychometric assessment summary table**

|                                                      | Affected siblings<br>(n=103) |       |       |        | Atypically developing siblings<br>(n=54) |       |       |        | Typically developing siblings<br>(n=131) |        |       |        |
|------------------------------------------------------|------------------------------|-------|-------|--------|------------------------------------------|-------|-------|--------|------------------------------------------|--------|-------|--------|
|                                                      | Mean                         | SD    | Range |        | Mean                                     | SD    | Range |        | Mean                                     | SD     | Range |        |
| <b>Autism Diagnostic Observation Schedule (ADOS)</b> |                              |       |       |        |                                          |       |       |        |                                          |        |       |        |
| Social Affect Severity Score                         | n = 51                       | 6.31  | 1.79  | 1-10   | n = 42                                   | 2.14  | 1.12  | 1-5    | n = 53                                   | 2.08   | 1.21  | 1-6    |
| Restricted, Repetitive Behaviours Severity Score     | n = 66                       | 7.74  | 2.11  | 1-10   | n = 54                                   | 4.76  | 2.52  | 1-9    | n = 77                                   | 3.48   | 2.67  | 1-9    |
| Calibrated Severity Score                            | n = 49                       | 7.04  | 2.01  | 1-10   | n = 40                                   | 2.13  | 1.24  | 1-5    | n = 53                                   | 1.75   | 1.09  | 1-6    |
| <b>Autism Diagnostic Interview - Revised (ADI-R)</b> |                              |       |       |        |                                          |       |       |        |                                          |        |       |        |
| Reciprocal Social Interaction                        | n = 32                       | 12.13 | 5.80  | 1-22   | n = 21                                   | 4.38  | 3.22  | 0-11   | n = 25                                   | 3.32   | 3.66  | 0-16   |
| Communication (verbal)                               | n = 24                       | 9.88  | 4.25  | 2-18   | n = 20                                   | 4.30  | 3.25  | 0-13   | n = 25                                   | 2.56   | 2.72  | 0-13   |
| Communication (non-verbal)                           | n = 9                        | 11.11 | 1.69  | 7-13   | n = 1                                    | 3     | N/A   | N/A    | n = 1                                    | 9      | N/A   | N/A    |
| Restricted, Repetitive Behaviours and Stereotypy     | n = 32                       | 4.50  | 2.86  | 0-10   | n = 21                                   | 1.57  | 1.86  | 0-6    | n = 25                                   | 0.96   | 1.27  | 0-4    |
| Developmental Abnormality                            | n = 33                       | 2.79  | 1.52  | 0-5    | n = 21                                   | 1.38  | 1.12  | 0-4    | n = 25                                   | 0.68   | 0.99  | 0-3    |
| <b>Child's Behavioural Checklist (CBCL)</b>          |                              |       |       |        |                                          |       |       |        |                                          |        |       |        |
| Internalizing T-Score                                |                              | 52.77 | 12.48 | 29-84  |                                          | 44.37 | 11.05 | 29-70  |                                          | 39.82  | 10.62 | 29-70  |
| Externalizing T-Score                                |                              | 56.23 | 11.58 | 32-86  |                                          | 48.47 | 12.43 | 28-82  |                                          | 42.96  | 8.35  | 32-59  |
| Affective T-Score                                    |                              | 55.83 | 8.10  | 50-84  |                                          | 53.21 | 5.46  | 50-67  |                                          | 51.21  | 2.42  | 50-63  |
| Anxiety T-Score                                      | n = 35                       | 53.74 | 6.32  | 50-81  | n = 19                                   | 54.05 | 7.71  | 50-79  | n = 28                                   | 51.68  | 3.04  | 50-60  |
| ADHD T-Score                                         |                              | 56.91 | 7.41  | 50-76  |                                          | 53.21 | 5.01  | 50-71  |                                          | 51.32  | 2.09  | 50-57  |
| Odd T-Score                                          |                              | 56.54 | 7.56  | 50-80  |                                          | 55.11 | 8.72  | 50-80  |                                          | 51.82  | 3.67  | 50-67  |
| Total Problems T-Score                               |                              | 55.69 | 11.90 | 31-90  |                                          | 47.05 | 10.68 | 28-65  |                                          | 41.46  | 8.77  | 30-65  |
| <b>Mullen Scales of Early Learning (MSEL)</b>        |                              |       |       |        |                                          |       |       |        |                                          |        |       |        |
| Early Learning Composite                             | n = 56                       | 86.16 | 23.90 | 49-137 | n = 50                                   | 89.46 | 17.55 | 56-127 | n = 88                                   | 109.32 | 15.89 | 67-150 |
| Visual Reception T-Score                             | n = 62                       | 44.08 | 18.07 | 20-80  | n = 51                                   | 50.25 | 15.12 | 20-80  | n = 95                                   | 61.43  | 11.28 | 36-80  |
| Fine Motor T-Score                                   | n = 64                       | 37.28 | 13.87 | 20-71  | n = 51                                   | 43.00 | 12.22 | 20-67  | n = 95                                   | 51.27  | 12.75 | 20-80  |
| Receptive Language T-Score                           | n = 57                       | 40.58 | 13.73 | 19-75  | n = 52                                   | 42.33 | 10.26 | 20-70  | n = 95                                   | 50.96  | 8.48  | 25-71  |
| Expressive Language T-Score                          | n = 60                       | 41.47 | 13.71 | 19-65  | n = 52                                   | 43.98 | 10.81 | 23-70  | n = 94                                   | 54.02  | 8.73  | 21-80  |
| <b>Vineland Adaptive Behavioural Scales (VABS)</b>   |                              |       |       |        |                                          |       |       |        |                                          |        |       |        |
| Adaptive Behaviour Composite                         | n = 40                       | 81.40 | 13.75 | 55-116 | n = 37                                   | 94.14 | 13.72 | 69-133 | n = 57                                   | 99.88  | 8.06  | 82-118 |
| Communication Standard Score                         | n = 44                       | 88.25 | 16.47 | 57-120 | n = 40                                   | 96.40 | 12.29 | 68-123 | n = 60                                   | 105.43 | 9.69  | 87-132 |
| Daily Living Standard Score                          | n = 40                       | 79.68 | 13.20 | 53-111 | n = 37                                   | 92.08 | 16.39 | 23-121 | n = 57                                   | 97.19  | 11.20 | 58-121 |
| Socialization Standard Score                         | n = 46                       | 86.33 | 15.07 | 60-118 | n = 40                                   | 95.58 | 11.85 | 73-120 | n = 66                                   | 99.86  | 9.30  | 81-120 |
| Motor Standard Score                                 | n = 46                       | 81.40 | 13.75 | 55-116 | n = 37                                   | 96.76 | 13.78 | 75-146 | n = 57                                   | 97.28  | 11.03 | 77-143 |

**Supplementary Table 3: De novo CNVs in all subjects**

| Individual ID               | Sex | Status                        | Family type | Cytoband        | #:start-end (hg19)    | Size    | CNV type | Genes                                                                                                                                                                                                                                                                                                                                                                                                                                                                                                                                                                                                                                                                                                                                                                                                                                                                                                                                                                                                                                                                  |
|-----------------------------|-----|-------------------------------|-------------|-----------------|-----------------------|---------|----------|------------------------------------------------------------------------------------------------------------------------------------------------------------------------------------------------------------------------------------------------------------------------------------------------------------------------------------------------------------------------------------------------------------------------------------------------------------------------------------------------------------------------------------------------------------------------------------------------------------------------------------------------------------------------------------------------------------------------------------------------------------------------------------------------------------------------------------------------------------------------------------------------------------------------------------------------------------------------------------------------------------------------------------------------------------------------|
| 1-0083-003                  | M   | proband                       | simplex     | 7q31.1-7q.31    | 7:108606430-119657890 | 11.1 Mb | loss     | <i>1FOXP2;EIF3IP1;MIR6132;IMMP2L;LOC100996249;LINC01393;CTTNBP2;DOCK4;LINC00998;LINC01510;LSMEM1;CAV2;CAV1;ANKRD7;ST7-AS1;PPP1R3A;LINC01392;ST7;TES;GPR85;ST7-OT3;LSM8;TFEC;ST7-OT4;MDFIC;ASZ1;DOCK4-AS1;IFRD1;MIR3666;TMEM168;CAPZA2;ST7-AS2;C7orf60;WNT2;LRRN3;MET;ZNF277;LOC101928036;CFTR;LOC101928012</i>                                                                                                                                                                                                                                                                                                                                                                                                                                                                                                                                                                                                                                                                                                                                                         |
| 14-0139-001                 | F   | proband                       | simplex     | 19q13.33        | 19:48462617-51107899  | 2.6 Mb  | gain     | <i>MIR4751;LIN7B;SNAR-D;SIGLEC11;MAMSTR;CD37;IZUMO1;MED25;PIH1D1;MYH14;ASPDH;NOSIP;NAPSA;NAPSB;RPL18;GRWD1;SNAR-G2;LIG1;ADM5;ZNF473;ELSPBP1;LHB;VRK3;PNKP;MIR4749;PRMT1;BCAT2;EMC10;SIGLEC16;ALDH16A1;LRRC4B;MIR6800;CCDC155;MIR6799;NUCB1;HRC;MIR4750;LMTK3;MIR6798;PRRG2;MIR150;IZUMO2;PLEKHA4;DKKL1;DBP;BSPH1;HSD17B14;PTOV1;FUZ;SNORD35A;SNORD35B;SYNGR4;RRAS;PRR12;RUVBL2;TULP2;SEC1P;PTOV1-AS2;C19orf68;PTOV1-AS1;SNAR-G1;CARD8;AKT1S1;TRPM4;NR1H2;RCN3;SNORD32A;SNAR-A14;SNAR-A11;SNAR-A10;GYS1;PTH2;FTL;SPACA4;RPL13AP5;KDELRI;NUCB1-AS1;CABP5;TBC1D17;MYBPC2;SULT2B1;ZNF114;FGF21;RASIP1;DHDH;KCNA7;C19orf73;NUP62;POLDI;CGB;RPL13A;SNAR-A9;SNAR-A8;SNAR-A3;IL4I1;SNRNP70;SNAR-A7;SLC6A16;SNAR-A5;SNAR-A4;IRF3;NTF4;TSKS;CGB5;CGB7;CGB1;CGB2;SPIB;SNAR-B1;FLT3LG;SCAF1;JOSD2;CCDC114;SLC17A7;NTN5;SNAR-A6;PPP1R15A;EMP3;CARD8-AS1;SPHK2;RPS11;MIR4324;KCNC3;BAX;TEAD2;CGB8;FAM83E;FLJ26850;PPF1A3;BCL2L12;LOC101059948;FAM71E1;MIR5088;FCGRT;CPT1C;FUT1;KCNJ14;CA11;LOC101928295;AP2A1;PLA2G4C;CYTH2;SNAR-B2;GFY;SNORD34;SNORD33;FUT2;GRIN2D;ATF5;TMEM143</i> |
| 12-4453-005                 | M   | atypically developing sibling | simplex     | 15q21.3-15q22.2 | 15:57859275-59410122  | 1.6 Mb  | gain     | <i>CCNB2;LIPC;FAM63B;SLTM;GCOM1;HSP90AB4P;AQP9;ADAM10;LOC101928694;MYZAP;RNF111;POLR2M;ALDH1A2</i>                                                                                                                                                                                                                                                                                                                                                                                                                                                                                                                                                                                                                                                                                                                                                                                                                                                                                                                                                                     |
| 14-0387-001                 | F   | proband                       | simplex     | 5p14.3          | 5:18767377-20113902   | 1.4 Mb  | Loss     | <i>CDH18</i>                                                                                                                                                                                                                                                                                                                                                                                                                                                                                                                                                                                                                                                                                                                                                                                                                                                                                                                                                                                                                                                           |
| 1-0298-003                  | M   | proband                       | simplex     | 17q25.3         | 17:79330617-80189678  | 859 kb  | gain     | <i><sup>2</sup>C17orf70;ACTG1;TSPAN10;ANAPC11;OXL1;STRA13;RFNG;ARL16;MIR3186;NPLOC4;PYCR1;SLC25A10;GPSI;DUS1L;MIR6786;MAFG-AS1;DCXR;FASN;LOC100130370;ARHGDLA;MAFG;BAHCC1;MIR4740;MRPL12;SIRT7;RAC3;CCDC57;P4HB;PCYT2;HGS;ALYREF;GCGR;MYADML2;FSCN2;ASPSR1;CCDC137;NOTUM;FAM195B;SLC16A3;NPB;PPP1R27;PDE6G;LRRC45</i>                                                                                                                                                                                                                                                                                                                                                                                                                                                                                                                                                                                                                                                                                                                                                  |
|                             |     |                               |             |                 | 17:80190109-80252756  | 63 kb   | loss     | <i><sup>3</sup>LINC01970;SLC16A3;CSNK1D;MIR6787</i>                                                                                                                                                                                                                                                                                                                                                                                                                                                                                                                                                                                                                                                                                                                                                                                                                                                                                                                                                                                                                    |
| 14-0376-004                 | M   | typically developing sibling  | simplex     | 16p11.2         | 16:29567296-30177928  | 610 kb  | loss     | <i>DOC2A;ASPHD1;TBX6;PRRT2;CDIPT;QPRT;SMG1P2;YPEL3;SLC7A5P1;PPP4C;MAPK3;SPN;MVP;FAM57B;ZG16;ALDOA;INO80E;SEZ6L2;TAOK2;KCTD13;MAZ;KIF22;GDPD3;C16orf92;C16orf54;CDIPT-AS1;TMEM219;PAGR1;HIRIP3</i>                                                                                                                                                                                                                                                                                                                                                                                                                                                                                                                                                                                                                                                                                                                                                                                                                                                                      |
| 4-0040-003                  | F   | proband                       | multiplex   | 18p11.32        | 18:380185-926925      | 547 kb  | gain     | <i>C18orf56;CETN1;TYMS;CLULL;COLEC12;YES1;ADCYAP1;ENOSF1</i>                                                                                                                                                                                                                                                                                                                                                                                                                                                                                                                                                                                                                                                                                                                                                                                                                                                                                                                                                                                                           |
| 15-1126-001                 | F   | proband                       | multiplex   | 7q36.3          | 7:155124600-155465851 | 341 kb  | gain     | <i>RBM33;BLACE;EN2;CNPY1;LOC100506302</i>                                                                                                                                                                                                                                                                                                                                                                                                                                                                                                                                                                                                                                                                                                                                                                                                                                                                                                                                                                                                                              |
| 14-0258-001                 | F   | proband                       | simplex     | 2q32.1-2        | 2:189149450-189477881 | 328 kb  | loss     | <i>GULP1;LINC01090;MIR561</i>                                                                                                                                                                                                                                                                                                                                                                                                                                                                                                                                                                                                                                                                                                                                                                                                                                                                                                                                                                                                                                          |
| 14-0243-004                 | F   | typically developing sibling  | simplex     | 15q22.31        | 15:64721928-65000963  | 279 kb  | loss     | <i>TRIP4;ZNF609;OAZ2</i>                                                                                                                                                                                                                                                                                                                                                                                                                                                                                                                                                                                                                                                                                                                                                                                                                                                                                                                                                                                                                                               |
| 14-0384-001                 | F   | proband                       | simplex     | 16p11.2         | 16:28808206-29051191  | 243 kb  | loss     | <i>ATXN2L;ATP2A1;NEATC2IP;ATP2A1-AS1;MIR4721;SPNS1;RABEP2;SH2B1;LAT;MIR4517;TUFM;CD19</i>                                                                                                                                                                                                                                                                                                                                                                                                                                                                                                                                                                                                                                                                                                                                                                                                                                                                                                                                                                              |
| 1-0616-005 (non-infant sib) | M   | typically developing sibling  | simplex     | 5p15.33         | 5:1282492-1474755     | 192 kb  | gain     | <i>SLC6A3;LINC01511;CLPTML;TERT;MIR4457;LPCAT1</i>                                                                                                                                                                                                                                                                                                                                                                                                                                                                                                                                                                                                                                                                                                                                                                                                                                                                                                                                                                                                                     |
| 1-0514-003                  | M   | proband                       | simplex     | 7p22.1          | 7:5392787-5522717     | 130 kb  | loss     | <i>FBXL18;TNRC18</i>                                                                                                                                                                                                                                                                                                                                                                                                                                                                                                                                                                                                                                                                                                                                                                                                                                                                                                                                                                                                                                                   |
| 1-0514-004                  | F   | atypically developing sibling | simplex     | Xq13.1          | X:68321236-68450191   | 129 kb  | gain     | <i>PJAI;LINC00269</i>                                                                                                                                                                                                                                                                                                                                                                                                                                                                                                                                                                                                                                                                                                                                                                                                                                                                                                                                                                                                                                                  |
| 14-0119-001                 | M   | proband                       | simplex     | 1q21.3          | 1:151144910-151243214 | 98 kb   | loss     | <i>PSMD4;TMOD4;PIP5K1A;VPS72</i>                                                                                                                                                                                                                                                                                                                                                                                                                                                                                                                                                                                                                                                                                                                                                                                                                                                                                                                                                                                                                                       |
| 14-0356-004                 | F   | atypically developing sibling | simplex     | 1q22            | 1:155561901-155636887 | 75 kb   | loss     | <i>MSTO1;MSTO2P;YIAP1</i>                                                                                                                                                                                                                                                                                                                                                                                                                                                                                                                                                                                                                                                                                                                                                                                                                                                                                                                                                                                                                                              |
| 14-0033-004                 | M   | typically developing sibling  | simplex     | 2q22.1          | 2:141414593-141432376 | 17.8 kb | loss     | <i>LRP1B</i>                                                                                                                                                                                                                                                                                                                                                                                                                                                                                                                                                                                                                                                                                                                                                                                                                                                                                                                                                                                                                                                           |

1. Published by Feuk *et al.* (2006)  
2. Published by Pinto *et al.* (2010)



**Supplementary Table 4: Clinically-relevant CNVs in probands (n=253), ASD affected siblings (n=103), atypically developing siblings (n=54) and unaffected siblings (n=131)**

| Individual ID                | Sex | Status                        | Family Type | Inheritance | Cytoband        | #Start-End (hg19)                                           | Size    | Variant type | Diagnostic Classification | Genes                                                                                                                                                                                                                                                                                                                                                                                                                                                                                                                                                                                                                                                                                                                                                                                                                                                                                                                                                                                                                                                                                                                                                                                                                                                                                                                                                                                                                                                                                                                                                                                                                                                                                  |
|------------------------------|-----|-------------------------------|-------------|-------------|-----------------|-------------------------------------------------------------|---------|--------------|---------------------------|----------------------------------------------------------------------------------------------------------------------------------------------------------------------------------------------------------------------------------------------------------------------------------------------------------------------------------------------------------------------------------------------------------------------------------------------------------------------------------------------------------------------------------------------------------------------------------------------------------------------------------------------------------------------------------------------------------------------------------------------------------------------------------------------------------------------------------------------------------------------------------------------------------------------------------------------------------------------------------------------------------------------------------------------------------------------------------------------------------------------------------------------------------------------------------------------------------------------------------------------------------------------------------------------------------------------------------------------------------------------------------------------------------------------------------------------------------------------------------------------------------------------------------------------------------------------------------------------------------------------------------------------------------------------------------------|
| 1-0083-003                   | M   | proband                       | simplex     | de novo     | 7q31.1-7q31     | 7:108606430-119657890                                       | 11.1 Mb | loss         | Pathogenic                | <sup>1</sup> FOX2;EIF3IP1;MIR6132;IMMP2L;LOC100996249;LINC01393;CTTNBP2;DOCK4;LINC00998;LINC01510;LSMEM1;CAV2;CAV1;ANKRD7;SIT7-AS1;PPP1R3A;LINC01392;ST7;TES;GPR85;ST7-OT3;LSM8;TFEC;ST7-OT4;MDFIC;ASZ1;DOCK4-AS1;1FRD1;MIR3666;TMEM168;CAPZA2;SIT7-AS2;C7orf60;WNT2;LRN3;MET;ZNF277;LOC101928036;CFTR;LOC101928012                                                                                                                                                                                                                                                                                                                                                                                                                                                                                                                                                                                                                                                                                                                                                                                                                                                                                                                                                                                                                                                                                                                                                                                                                                                                                                                                                                    |
| 10-1076-004                  | M   | ASD sibling                   | multiplex   | maternal    | 22q11.21        | 22:18644791-21465659 (22q11.2 duplication syndrome)         | 2.8 Mb  | gain         | Pathogenic                | FAM230A;RIMBP3;TMEM191A;LINC00896;PIAK4;LINC00895;AIFM3;SLC7A4;SNORA77B;MIR185;GNB1L;TBX1;MIR3618;TANGO2;MIR1306;SEPT5;LOC102725072;GP1BB;THAP7;ZNF74;P2RX6;DGC99;PRODH;BCRP2;CRKL;C22orf29;TMEM191B;MIR649;DGC2;DGC5;LINC01637;DGC6;C22orf39;LINC01311;DGC86;MED15;UFD1;TXNRD2;CLDN3;RTN4R;TSSK2;GSC2;ARVCFL;SLC25A1;MIR4761;COMT;LOC284865;P2RX6P;CDC45;THAP7-AS1;DGC8;KLHL2;CTCL1;USP18;LINC01660;SERPIND1;LRRC74B;LOC103379550;MIR6816;LOC101927859;SCARF2;HIRA;CCDC188;MIR1286;RANBP1;GGT3P;POM121LAP;SNAP29;PI4KAP1;DGC81;DGC810;MRPL40;TUBA3FP;DGC814;ZDHHC8;LINC01662;LINC01663;TRMT2A;LZTR1;LOC100996415;SEPT5;GP1BB;MIR4751;LIN7B;SNAR-D;SIGLEC1;MAMSTR;CD37;IZUMO1;MED25;PIH1D1;MYH14;ASPDH;NOSIP;NAPSA;NAPS8;RPL18;GRWD1;SNARG2;LIG1;ADM5;ZNF473;ELSPBP1;LHB;VRK3;PNKP;MIR4749;PRMT1;BCAT2;EMC10;SIGLEC16;ALDH16A1;LRRC4B;MIR6800;CCDC155;MIR6799;NUCB1;HRC;MIR4750;LMTK3;MIR6798;PRRG2;MIR150;IZUMO2;PLEKHA4;DKKL1;DBP;BSPH1;HSD17B14;PTOVI;FUZ;SNORD35A;SNORD35B;SYNGR4;RRAS;PRR12;RUVBL2;TULP2;SEC1P;PTOVI-AS2;C19orf68;PTOVI-AS1;SNAR-G1;CARD8;AKT1S1;TRPM4;NR1H2;RCN3;SNORD32A;SNAR-A14;SNAR-A11;SNAR-A10;GYS1;PTH2;FTL;SPACA4;RPL13AP5;KDELRF1;NUCB1AS1;CABP5;TBC1D17;MYBPC2;SULT2B1;ZNF114;FGF21;RASIP1;DHDH;KCN47;C19orf73;UP62;POLD1;CGB;RPL13A;SNAR-A9;SNAR-A8;SNAR-A3;IL11;SNRN70;SNAR-A7;SLC6A16;SNAR-AS;SNAR-A4;IRF3;NTF4;TSKS;CGB5;CGB7;CGB1;CGB2;SPIB;SNAR-B1;FLT3LG;SCAF1;JOSD2;CCDC114;SLC17A7;NTN5;SNAR6;PPP1R15A;EMP3;CARD8-AS1;SPHK2;RPS11;MIR4324;KCNC3;BAX;TEAD2;CGB8;FAM83E;FLJ26850;PPF1A3;BCL2L12;LOC101059948;FAM71E1;MIR5088;FCGRT;CPTIC;FUT1;KCNJ14;CA11;LOC101928295;AP2A1;PLA2G4C;CYTH2;SNAR-B2;GFY;SNORD34;SNORD33;FUT2;GRIN2D;ATF5;TMEM143 |
| 14-0139-001                  | F   | proband                       | simplex     | de novo     | 19q13.33        | 19:48462617-51107899                                        | 2.6 Mb  | gain         | VUS                       |                                                                                                                                                                                                                                                                                                                                                                                                                                                                                                                                                                                                                                                                                                                                                                                                                                                                                                                                                                                                                                                                                                                                                                                                                                                                                                                                                                                                                                                                                                                                                                                                                                                                                        |
| 4-0061-004                   | M   | atypically developing sibling | simplex     | paternal    | 3p26.3-2        | 3:1080020-2886098                                           | 1.8 Mb  | loss         | VUS                       | CNTN6;CNTN4;CNTN4-AS2                                                                                                                                                                                                                                                                                                                                                                                                                                                                                                                                                                                                                                                                                                                                                                                                                                                                                                                                                                                                                                                                                                                                                                                                                                                                                                                                                                                                                                                                                                                                                                                                                                                                  |
| 12-8115-001                  | M   | proband                       | simplex     | maternal    | 16p13.11        | 16:14866284-16529801 (16p13.11 microduplication syndrome)   | 1.7 Mb  | gain         | VUS                       | LOC100288162;MYH11;MIR484;MARF1;NTAN1;FOPNL;NDE1;ABCC1;PKD1P4-NPIP48;MIR6511A3;MIR6506;PKD1P1;PKD1P3-NPIP1A1;ABCC6P2;MIR3670-4;MIR6511A2;MIR6511A1;MIR3670-1;MIR3670-2;MIR6511A4;C16orf45;LOC100505915;MIR3670-3;PKD1P6-NPIP1;NOMO3;NOMO1;MIR3179-2;MIR3179-3;MIR3180-4;MIR3179-1;MIR3180-2;MIR3180-3;MIR3179-4;MIR3180-1;NPIP47;PDXC1;RRN3;MIR6511B2;MPV17L;NPIP1;NPIP48;NPIP45;ABCC6;MIR6511B1;MIR6770-2;MIR6770-3;MIR6770-1                                                                                                                                                                                                                                                                                                                                                                                                                                                                                                                                                                                                                                                                                                                                                                                                                                                                                                                                                                                                                                                                                                                                                                                                                                                         |
| 12-4453-005                  | M   | atypically developing sibling | simplex     | de novo     | 15q21.3-15q22.3 | 15:57859275-59410122                                        | 1.6 Mb  | gain         | VUS                       | CCNB2;LIPC;FAM63B;SLTM;GCOM1;HSP90AB4P;AQP9;ADAM10;LOC101928694;MYZAP;RNF111;POLR2M;ALDH1A2                                                                                                                                                                                                                                                                                                                                                                                                                                                                                                                                                                                                                                                                                                                                                                                                                                                                                                                                                                                                                                                                                                                                                                                                                                                                                                                                                                                                                                                                                                                                                                                            |
| 4-0027-003                   | M   | proband                       | simplex     | maternal    | 15q13.1-2       | 15:29010256-30386398                                        | 1.4 Mb  | gain         | VUS                       | LOC100289656;TJPI1;APBA2;GOLGA8;GOLGA6L7P;PDCC6IP2;NDNL2;FAM189A1                                                                                                                                                                                                                                                                                                                                                                                                                                                                                                                                                                                                                                                                                                                                                                                                                                                                                                                                                                                                                                                                                                                                                                                                                                                                                                                                                                                                                                                                                                                                                                                                                      |
| 4-0027-004                   | F   | atypically developing sibling | simplex     | maternal    | 15q13.1-2       | 15:29010256-30386398                                        | 1.4 Mb  | gain         | VUS                       | LOC100289656;TJPI1;APBA2;GOLGA8;GOLGA6L7P;PDCC6IP2;NDNL2;FAM189A1                                                                                                                                                                                                                                                                                                                                                                                                                                                                                                                                                                                                                                                                                                                                                                                                                                                                                                                                                                                                                                                                                                                                                                                                                                                                                                                                                                                                                                                                                                                                                                                                                      |
| 1-0298-003                   | M   | proband                       | simplex     | de novo     | 17q25.3         | 17:79330617-80189678                                        | 859 kb  | gain         | VUS                       | <sup>2</sup> C17orf70;ACTG1;TSPAN10;ANAPC11;OXLD1;STRA13;RFNG;ARL16;MIR3186;NPLOC4;PYCR1;SLC25A10;GPS1;DUS1L;MIR6786;MAFG-AS1;DCXR;FASN;LOC100130370;ARHGDL4;MAFG;BAHCC1;MIR4740;MRPL12;SIR7;RAC3;CCDC57;P4HB;PCYT2;HGS;ALYREF;CGCR;MYADM12;FSCN2;ASPSCR1;CCDC137;NOTUM;FAM195B;SLC16A3;NPB;PPP1R27;PDE6G;LRRC45                                                                                                                                                                                                                                                                                                                                                                                                                                                                                                                                                                                                                                                                                                                                                                                                                                                                                                                                                                                                                                                                                                                                                                                                                                                                                                                                                                       |
| 14-0152-001                  | M   | proband                       | simplex     | N/A         | 2q23.3          | 17:80190109-80252756                                        | 63 kb   | loss         | VUS                       | <sup>2</sup> LINC01970;SLC16A3;CSNK1D;MIR6787                                                                                                                                                                                                                                                                                                                                                                                                                                                                                                                                                                                                                                                                                                                                                                                                                                                                                                                                                                                                                                                                                                                                                                                                                                                                                                                                                                                                                                                                                                                                                                                                                                          |
| 14-0376-004                  | M   | typically developing sibling  | simplex     | de novo     | 16p11.2         | 16:29567296-30177928 (16p11.2 microdeletion syndrome BP4-5) | 610 kb  | loss         | Pathogenic                | FAMN12;ARL5A;STAM2;NEB;CACNB4                                                                                                                                                                                                                                                                                                                                                                                                                                                                                                                                                                                                                                                                                                                                                                                                                                                                                                                                                                                                                                                                                                                                                                                                                                                                                                                                                                                                                                                                                                                                                                                                                                                          |
| 14-0384-001                  | F   | proband                       | simplex     | de novo     | 16p11.2         | 16:28808206-29051191 (16p11.2 microdeletion syndrome BP2-3) | 243 kb  | loss         | Pathogenic                | DOC2A;ASPHD1;TBX6;PRRT2;CDIPT;QPR7;SMG1P2;YPEL3;SLC7A5P1;PPP4C;MAPK3;SPN;MVP;FAM57B;ZG16;ALDOA;INO80E;SEZ6L2;TAOK2;KCTD13;MAZ;KIF22;GDPD3;C16orf92;C16orf92;CDIPT-AS1;TMEM219;PAGR1;HIRIP3                                                                                                                                                                                                                                                                                                                                                                                                                                                                                                                                                                                                                                                                                                                                                                                                                                                                                                                                                                                                                                                                                                                                                                                                                                                                                                                                                                                                                                                                                             |
| 4-0062-003                   | M   | proband                       | simplex     | paternal    | 2p16.3          | 2:51141571-51370150                                         | 229 kb  | loss         | Likely Pathogenic         | NRXN1;LOC730100                                                                                                                                                                                                                                                                                                                                                                                                                                                                                                                                                                                                                                                                                                                                                                                                                                                                                                                                                                                                                                                                                                                                                                                                                                                                                                                                                                                                                                                                                                                                                                                                                                                                        |
| 4-0062-004                   | F   | atypically developing sibling | simplex     | paternal    | 2p16.3          | 2:51141571-51370150                                         | 229 kb  | loss         | Likely Pathogenic         | NRXN1;LOC730100                                                                                                                                                                                                                                                                                                                                                                                                                                                                                                                                                                                                                                                                                                                                                                                                                                                                                                                                                                                                                                                                                                                                                                                                                                                                                                                                                                                                                                                                                                                                                                                                                                                                        |
| 1-0616-003                   | M   | proband                       | simplex     | maternal    | 16p11.2         | 16:28824491-29051191 (16p11.2 microdeletion syndrome BP2-3) | 227 kb  | loss         | Pathogenic                | ATXN2L;ATP2A1;NFATC2IP;ATP2A1-AS1;MIR4721;SPNS1;RABEP2;SH2B1;LAT;MIR4517;TUFM;CD19                                                                                                                                                                                                                                                                                                                                                                                                                                                                                                                                                                                                                                                                                                                                                                                                                                                                                                                                                                                                                                                                                                                                                                                                                                                                                                                                                                                                                                                                                                                                                                                                     |
| 1-0616-004                   | M   | atypically developing sibling | simplex     | maternal    | 16p11.2         | 16:28824491-29051191 (16p11.2 microdeletion syndrome BP2-3) | 227 kb  | loss         | Pathogenic                | ATXN2L;ATP2A1;NFATC2IP;ATP2A1-AS1;MIR4721;SPNS1;RABEP2;SH2B1;LAT;MIR4517;TUFM;CD19                                                                                                                                                                                                                                                                                                                                                                                                                                                                                                                                                                                                                                                                                                                                                                                                                                                                                                                                                                                                                                                                                                                                                                                                                                                                                                                                                                                                                                                                                                                                                                                                     |
| 1-0616-005 (non-infant sib)  | M   | typically developing sibling  | simplex     | maternal    | 16p11.2         | 16:28824491-29051191 (16p11.2 microdeletion syndrome BP2-3) | 227 kb  | loss         | Pathogenic                | ATXN2L;ATP2A1;NFATC2IP;ATP2A1-AS1;MIR4721;SPNS1;RABEP2;SH2B1;LAT;MIR4517;TUFM;CD19                                                                                                                                                                                                                                                                                                                                                                                                                                                                                                                                                                                                                                                                                                                                                                                                                                                                                                                                                                                                                                                                                                                                                                                                                                                                                                                                                                                                                                                                                                                                                                                                     |
| 12-4168-004 (non-infant sib) | M   | ASD sibling                   | multiplex   | paternal    | 2q24.1-2q23.3   | 2:154881876-155011019                                       | 129 kb  | loss         | VUS                       | GALNT13                                                                                                                                                                                                                                                                                                                                                                                                                                                                                                                                                                                                                                                                                                                                                                                                                                                                                                                                                                                                                                                                                                                                                                                                                                                                                                                                                                                                                                                                                                                                                                                                                                                                                |
| 12-4168-006 (non-infant sib) | F   | ASD sibling                   | multiplex   | paternal    | 2q24.1-2q23.3   | 2:154881876-155011019                                       | 129 kb  | loss         | VUS                       | GALNT13                                                                                                                                                                                                                                                                                                                                                                                                                                                                                                                                                                                                                                                                                                                                                                                                                                                                                                                                                                                                                                                                                                                                                                                                                                                                                                                                                                                                                                                                                                                                                                                                                                                                                |
| 12-4168-007 (non-infant sib) | M   | ASD sibling                   | multiplex   | paternal    | 2q24.1-2q23.3   | 2:154881876-155011019                                       | 129 kb  | loss         | VUS                       | GALNT13                                                                                                                                                                                                                                                                                                                                                                                                                                                                                                                                                                                                                                                                                                                                                                                                                                                                                                                                                                                                                                                                                                                                                                                                                                                                                                                                                                                                                                                                                                                                                                                                                                                                                |
| 12-8257-001                  | M   | proband                       | multiplex   | maternal    | Xp22.11         | X:23043876-23134236                                         | 90 kb   | loss         | Likely Pathogenic         | PTCHD1-AS                                                                                                                                                                                                                                                                                                                                                                                                                                                                                                                                                                                                                                                                                                                                                                                                                                                                                                                                                                                                                                                                                                                                                                                                                                                                                                                                                                                                                                                                                                                                                                                                                                                                              |
| 12-8257-004                  | M   | ASD sibling                   | multiplex   | maternal    | Xp22.11         | X:23043876-23134236                                         | 90 kb   | loss         | Likely Pathogenic         | PTCHD1-AS                                                                                                                                                                                                                                                                                                                                                                                                                                                                                                                                                                                                                                                                                                                                                                                                                                                                                                                                                                                                                                                                                                                                                                                                                                                                                                                                                                                                                                                                                                                                                                                                                                                                              |
| 12-8257-005 (non-infant sib) | M   | ASD sibling                   | multiplex   | maternal    | Xp22.11         | X:23043876-23134236                                         | 90 kb   | loss         | Likely Pathogenic         | PTCHD1-AS                                                                                                                                                                                                                                                                                                                                                                                                                                                                                                                                                                                                                                                                                                                                                                                                                                                                                                                                                                                                                                                                                                                                                                                                                                                                                                                                                                                                                                                                                                                                                                                                                                                                              |
| 4-0040-003                   | F   | proband                       | multiplex   | de novo     | 18p11.32        | 18:380185-926925                                            | 547 kb  | gain         | VUS                       | C18orf56;CETN1, TYMS, CLUL1, COLEC12, YES1, ADCY1P1, ENOSF1                                                                                                                                                                                                                                                                                                                                                                                                                                                                                                                                                                                                                                                                                                                                                                                                                                                                                                                                                                                                                                                                                                                                                                                                                                                                                                                                                                                                                                                                                                                                                                                                                            |
| 4-0040-003                   | F   | proband                       | multiplex   | de novo     | 18p11.32        | 18:380185-926925                                            | 547 kb  | gain         | VUS                       | C18orf56;CETN1, TYMS, CLUL1, COLEC12, YES1, ADCY1P1, ENOSF1                                                                                                                                                                                                                                                                                                                                                                                                                                                                                                                                                                                                                                                                                                                                                                                                                                                                                                                                                                                                                                                                                                                                                                                                                                                                                                                                                                                                                                                                                                                                                                                                                            |
| 4-0040-004                   | M   | ASD sibling                   | multiplex   | de novo     | 3p26.3          | 3:2609217-2679515                                           | 70 kb   | gain         | VUS                       | CNTN4                                                                                                                                                                                                                                                                                                                                                                                                                                                                                                                                                                                                                                                                                                                                                                                                                                                                                                                                                                                                                                                                                                                                                                                                                                                                                                                                                                                                                                                                                                                                                                                                                                                                                  |
| 1-0455-003                   | M   | proband                       | multiplex   | maternal    | 8p12            | 8:31991227-32056041                                         | 65 kb   | loss         | VUS                       | NRG1;NRG1-IT1                                                                                                                                                                                                                                                                                                                                                                                                                                                                                                                                                                                                                                                                                                                                                                                                                                                                                                                                                                                                                                                                                                                                                                                                                                                                                                                                                                                                                                                                                                                                                                                                                                                                          |
| 1-0455-004                   | M   | ASD sibling                   | multiplex   | maternal    | 8p12            | 8:31991227-32056041                                         | 65 kb   | loss         | VUS                       | NRG1;NRG1-IT1                                                                                                                                                                                                                                                                                                                                                                                                                                                                                                                                                                                                                                                                                                                                                                                                                                                                                                                                                                                                                                                                                                                                                                                                                                                                                                                                                                                                                                                                                                                                                                                                                                                                          |
| 13-0049-001                  | M   | proband                       | multiplex   | maternal    | 2q23.1          | 2:14093863-149151358                                        | 58 kb   | loss         | Likely Pathogenic         | MBD5                                                                                                                                                                                                                                                                                                                                                                                                                                                                                                                                                                                                                                                                                                                                                                                                                                                                                                                                                                                                                                                                                                                                                                                                                                                                                                                                                                                                                                                                                                                                                                                                                                                                                   |
| 13-0049-004                  | M   | ASD sibling                   | multiplex   | maternal    | 2q23.1          | 2:14093863-149151358                                        | 58 kb   | loss         | Likely Pathogenic         | MBD5                                                                                                                                                                                                                                                                                                                                                                                                                                                                                                                                                                                                                                                                                                                                                                                                                                                                                                                                                                                                                                                                                                                                                                                                                                                                                                                                                                                                                                                                                                                                                                                                                                                                                   |

VUS = variants of unknown significance

1. Published by Feuk et al. (2006)
2. Published by Pinto et al. (2010)

**Supplementary Table 5: Clinically-relevant SNVs and indels in probands (n=84), ASD affected siblings (n= 48), atypically developing siblings (n=14) and typically-developing siblings (n=56)**

| Individual ID | Sex | Status                        | Family Type | Inheritance    | Genes          | #:Start-End (hg19)         | Variant type                                            |
|---------------|-----|-------------------------------|-------------|----------------|----------------|----------------------------|---------------------------------------------------------|
| 1-0153-005    | M   | ASD sibling                   | multiplex   | <i>de novo</i> | <i>HUWE1</i>   | X:53595700                 | <sup>1</sup> NM_031407: c.G6659T: p.Gly2220Val, het     |
| 1-0236-004    | F   | ASD sibling                   | multiplex   | <i>de novo</i> | <i>SETD5</i>   | 3:9476019                  | NM_001080517: c.C179T:p.Thr60Met, het                   |
| 1-0004-003    | F   | proband                       | simplex     | paternal       | <i>NF1</i>     | 17:29654605                | NM_001042492: c.C5357A: p.Ser1786X, het                 |
| 1-0004-004    | M   | atypically developing sibling |             |                |                |                            |                                                         |
| 14-0387-004   | M   | typically developing sibling  | simplex     | <i>de novo</i> | <i>CHD8</i>    | 14:21871717                | NM_020920: c.T2576C: p.Ile859Thr, het                   |
| 1-0299-005    | F   | typically developing sibling  | multiplex   | <i>de novo</i> | <i>KMT2D</i>   | 12:49443580                | NM_003482: c.T3791C: p.Leu1264Pro, het                  |
| 1-0862-003    | M   | proband                       | simplex     | <i>de novo</i> | <i>DYNC1H1</i> | 14:102493980               | <sup>1</sup> NM_001376: c.G9073A: p.Glu3025Lys, het     |
|               |     |                               |             |                | <i>UPF3B</i>   | X:118971855-118971858, del | <sup>1</sup> NM_080632: c.1164_1167del: p.Arg388fs, het |
| 1-0700-003    | M   | proband                       | multiplex   | <i>de novo</i> | <i>KIF1A</i>   | 2:241728694                | NM_001244008: c.A142C: p.Lys48Gln, het                  |
| 2-1094-004    | M   | proband                       | multiplex   | <i>de novo</i> | <i>MEIS2</i>   | 15:37242546                | <sup>1</sup> NM_001220482: c.C956T: p.Thr319Ile, het    |
| 1-0449-003    | F   | proband                       | simplex     | maternal       | <i>PCDH19</i>  | X:99662281-99662282, del   | NM_001184880: c.1314_1315del: p.Ser438fs, het           |
| 1-0441-003    | M   | proband                       | simplex     | <i>de novo</i> | <i>SHANK2</i>  | 11:70336411                | <sup>1</sup> NM_133266: c.C757T: p.Arg253X, het         |
| 1-0533-003    | M   | proband                       | simplex     | <i>de novo</i> | <i>WDFY3</i>   | 4:85722860                 | <sup>1</sup> NM_014991: c.C2765T: p.Pro922Leu, het      |
| 1-0261-003    | F   | proband                       | multiplex   | <i>de novo</i> | <i>WDFY3</i>   | 4:85731437                 | <sup>1</sup> NM_014991: c.G1948A: p.Gly650Arg, het      |
| 1-1010-003    | M   | proband                       | simplex     | <i>de novo</i> | <i>WDR26</i>   | 1:224619226                | NM_025160: c.G580A: p.Val194Ile, het                    |

1. Published by Yuen *et al.* (2017)

**Supplementary Table 6: Occurrence of ASD-relevant CNVs (from infant sibling cohort) in probands and unaffected sibs from the Simons Simplex Collection**

|                                       | <b># CNVs found in probands (n=2,124)</b> | <b># CNVs found in non-ASD sibs (n=2,423)</b> |
|---------------------------------------|-------------------------------------------|-----------------------------------------------|
| <b>ASD-Relevant Genes</b>             |                                           |                                               |
| <i>CNTN4/CNTN6</i>                    | 4                                         | 8*                                            |
| <i>MBD5</i>                           | 2                                         | 0                                             |
| <i>NRXN1</i>                          | 5                                         | 2                                             |
| <i>PTCHD1-AS</i>                      | 3                                         | 2                                             |
| <b>Genomic Disorders</b>              |                                           |                                               |
| 16p11.2 microdeletion, distal (SH2B1) | 1                                         | 0                                             |
| 16p11.2 microdeletion (593 kb)        | 7                                         | 0                                             |
| 16p13.11 microduplication             | 5                                         | 5†                                            |
| 22q11.21 microduplication             | 3                                         | 0                                             |

\*Atypical female sib with CNTN6 deletion

†Atypical male sib with 16p13.11 duplication

**Supplementary Table 7: Predictive statistics of microarray findings for probands and their non-ASD siblings (with or without atypical development) from the Simons Simplex Collection**

|                                        | ASD<br>(all ASD-relevant<br>CNVs) | ASD +<br>Atypical development<br>(all ASD-relevant<br>CNVs) | ASD<br>(excluding VUS) | ASD +<br>Atypical development<br>(excluding VUS) |
|----------------------------------------|-----------------------------------|-------------------------------------------------------------|------------------------|--------------------------------------------------|
| Statistic                              |                                   |                                                             |                        |                                                  |
| Sensitivity<br>(0.95 CI)               | 0.05<br>(0.05-0.07)               | 0.05<br>(0.04-0.06)                                         | 0.04<br>(0.03-0.05)    | 0.04<br>(0.03-0.04)                              |
| Specificity<br>(0.95 CI)               | 0.97<br>(0.97-0.98)               | 0.97<br>(0.97-0.98)                                         | 0.99<br>(0.99-0.99)    | 0.99<br>(0.99-0.99)                              |
| Positive Predictive Value<br>(0.95 CI) | 0.65<br>(0.57-0.72)               | 0.69<br>(0.61-0.75)                                         | 0.79<br>(0.70-0.87)    | 0.83<br>(0.74-0.90)                              |
| Negative Predictive Value<br>(0.95 CI) | 0.54<br>(0.53-0.56)               | 0.48<br>(0.46-0.49)                                         | 0.54<br>(0.53-0.56)    | 0.48<br>(0.46-0.49)                              |
| Genotype-Phenotype                     |                                   |                                                             |                        |                                                  |
| Condition +                            | 2,124 <sup>1</sup>                | 2,412 <sup>2</sup>                                          | 2,124                  | 2,412                                            |
| CNV + / Condition +                    | 116                               | 123                                                         | 84                     | 88                                               |
| CNV + / Condition -                    | 63                                | 56                                                          | 22                     | 18                                               |
| CNV - / Condition -                    | 2,360                             | 2,079                                                       | 2,401                  | 2,117                                            |
| CNV - / Condition +                    | 2,008                             | 2,289                                                       | 2,040                  | 2,324                                            |
| Total Probands and Siblings            | 4,547                             | 4,547                                                       | 4,547                  | 4,547                                            |

VUS = variant of unknown significance

\* Genotype refers to the identification of ASD-relevant CNVs observed in infant siblings

<sup>1</sup> ASD probands (n=2,124)

<sup>2</sup> ASD probands (n=2,124) + non-ASD sibs with atypical development (n=288) (see "Simons Simplex Collection (SSC) to assess CNV false discovery" in Methods)

**Supplementary Table 8: Broader Autism Phenotype Questionnaire (BAPQ) summary by family type**

|                           | <b>Simplex families<br/>(n = 157)</b> | <b>Multiplex families<br/>(n=86)</b> |
|---------------------------|---------------------------------------|--------------------------------------|
| <b>BAPQ subscale</b>      | Average Score (SD)                    | Average Score (SD)                   |
| <b>Aloof</b>              |                                       |                                      |
| Mother                    | 2.70 (0.9)                            | 2.84 (1.0)                           |
| Father                    | 3.05 (0.9)                            | 3.09 (1.0)                           |
| <b>Pragmatic language</b> |                                       |                                      |
| Mother                    | 2.46 (0.7)                            | 2.40 (0.8)                           |
| Father                    | 2.28 (0.6)                            | 2.56 (0.7)                           |
| <b>Rigidity</b>           |                                       |                                      |
| Mother                    | 2.87 (0.6)                            | 3.14 (0.9)                           |
| Father                    | 3.00 (0.7)                            | 2.99 (1.0)                           |
| <b>Total score</b>        |                                       |                                      |
| Mother                    | 2.62 (0.6)                            | 2.79 (0.8)                           |
| Father                    | 2.84 (0.6)                            | 2.88 (0.8)                           |

## Supplementary Note 1

### Additional dataset acknowledgements

Funding support for the Study of Addiction: Genetics and Environment (SAGE) was provided through the NIH Genes, Environment and Health Initiative [GEI] (U01 HG004422). SAGE is one of the genome-wide association studies funded as part of the Gene Environment Association Studies (GENEVA) under GEI. Assistance with phenotype harmonization and genotype cleaning, as well as with general study coordination, was provided by the GENEVA Coordinating Center (U01 HG004446). Assistance with data cleaning was provided by the National Center for Biotechnology Information. Support for collection of datasets and samples was provided by the Collaborative Study on the Genetics of Alcoholism (COGA; U10 AA008401), the Collaborative Genetic Study of Nicotine Dependence (COGEND; P01 CA089392), and the Family Study of Cocaine Dependence (FSCD; R01 DA013423). Funding support for genotyping, which was performed at the Johns Hopkins University Center for Inherited Disease Research, was provided by the NIH GEI (U01HG004438), the National Institute on Alcohol Abuse and Alcoholism, the National Institute on Drug Abuse, and the NIH contract "High throughput genotyping for studying the genetic contributions to human disease" (HHSN268200782096C). The datasets used for the analyses described in this manuscript were obtained from dbGaP at [http://www.ncbi.nlm.nih.gov/projects/gap/cgi-bin/study.cgi?study\\_id=phs000092.v1.p1](http://www.ncbi.nlm.nih.gov/projects/gap/cgi-bin/study.cgi?study_id=phs000092.v1.p1) through dbGaP accession number phs000092.v1.p.

The authors acknowledge the contribution of data from Genetic Architecture of Smoking and Smoking Cessation accessed through dbGAP ([https://www.ncbi.nlm.nih.gov/projects/gap/cgi-bin/study.cgi?study\\_id=phs000404.v1.p1](https://www.ncbi.nlm.nih.gov/projects/gap/cgi-bin/study.cgi?study_id=phs000404.v1.p1), accession number phs000404.v1.p1). Funding support for genotyping, which was performed at

the Center for Inherited Disease Research (CIDR), was provided by 1 X01 HG005274-01. CIDR is fully funded through a federal contract from the National Institutes of Health to The Johns Hopkins University, contract number HHSN268200782096C. Assistance with genotype cleaning, as well as with general study coordination, was provided by the Gene Environment Association Studies (GENEVA) Coordinating Center (U01 HG004446). Funding support for collection of datasets and samples was provided by the Collaborative Genetic Study of Nicotine Dependence (COGEND; P01 CA089392) and the University of Wisconsin Transdisciplinary Tobacco Use Research Center (P50 DA019706, P50 CA084724).

The NEI Refractive Error Collaboration (NEIREC) Database found at [https://www.ncbi.nlm.nih.gov/projects/gap/cgi-bin/study.cgi?study\\_id=phs000303.v1.p1](https://www.ncbi.nlm.nih.gov/projects/gap/cgi-bin/study.cgi?study_id=phs000303.v1.p1) through dbGaP accession number phs000303.v1.p1 was also used for analyses. Funding support for NEIREC was provided by the National Eye Institute. We would like to thank NEIREC participants and the NEIREC Research Group for their valuable contribution to this research.”

Funding support for the “CIDR Visceral Adiposity Study” was provided through the Division of Aging Biology and the Division of Geriatrics and Clinical Gerontology, NIA. The CIDR Visceral Adiposity Study includes a genome-wide association study funded as part of the Division of Aging Biology and the Division of Geriatrics and Clinical Gerontology, NIA. Assistance with phenotype harmonization and genotype cleaning, as well as with general study coordination, was provided by Heath ABC Study Investigators. This dataset was obtained from dbGaP at [https://www.ncbi.nlm.nih.gov/projects/gap/cgi-bin/study.cgi?study\\_id=phs000169.v1.p1](https://www.ncbi.nlm.nih.gov/projects/gap/cgi-bin/study.cgi?study_id=phs000169.v1.p1) through accession number phs000169.v1.p1.

We are grateful to all of the families at the participating Simons Simplex Collection (SSC) sites, as well as the principal investigators (A. Beaudet, R. Bernier, J. Constantino, E.

Cook, E. Fombonne, D. Geschwind, R. Goin-Kochel, E. Hanson, D. Grice, A. Klin, D. Ledbetter, C. Lord, C. Martin, D. Martin, R. Maxim, J. Miles, O. Ousley, K. Pelphrey, B. Peterson, J. Piggot, C. Saulnier, M. State, W. Stone, J. Sutcliffe, C. Walsh, Z. Warren, E. Wijsman).



### **Supplementary References**

1. Yuen, R.K., et al. Genome-wide characteristics of de novo mutations in autism. *NPJ Genom Med* 1, 160271-1602710 (2016).
2. Pinto, D., et al. Functional impact of global rare copy number variation in autism spectrum disorders. *Nature* 466, 368-372 (2010).
3. Feuk, L., et al. Absence of a paternally inherited FOXP2 gene in developmental verbal dyspraxia. *Am J Hum Genet* 79, 965-972 (2006).
4. Yuen, R.K., et al. Whole genome sequencing resource identifies 18 new candidate genes for autism spectrum disorder. *Nat Neurosci* 20, 602-611 (2017).
