# Supplementary material for: Predictive impact of rare genomic copy number variations in siblings of individuals with autism spectrum disorders
Source: PubMed Central journal article supplement (PMC6892938; doi:10.1038/s41467-019-13380-2), 2019-12-05
Supplement: 41467_2019_13380_MOESM6_ESM.pdf [file 41467_2019_13380_MOESM6_ESM.pdf]

**Title:** Supplementary Data File 1.

**Description:** ASD-Relevant CNVs identified in probands and unaffected siblings from the Simons Simplex Collection 2.

**Title:** Supplementary Data File 2:

**Description:** List of rare CNVs 3.

**Title:** Supplementary Data File 3:

**Description:** List of ASD and neurodevelopmental delay candidate and risk genes
